# Supplementary material for: Nectandrin B significantly increases the lifespan of Drosophila - Nectandrin B for longevity
Source: Aging (Albany NY). 2023 Nov 19;15(22):12749–62. doi: 10.18632/aging.205234 (PMC10713431; doi:10.18632/aging.205234)
Supplement: Supplementary Figure 1 [file aging-15-205234-s001.pdf]

## SUPPLEMENTARY FIGURE

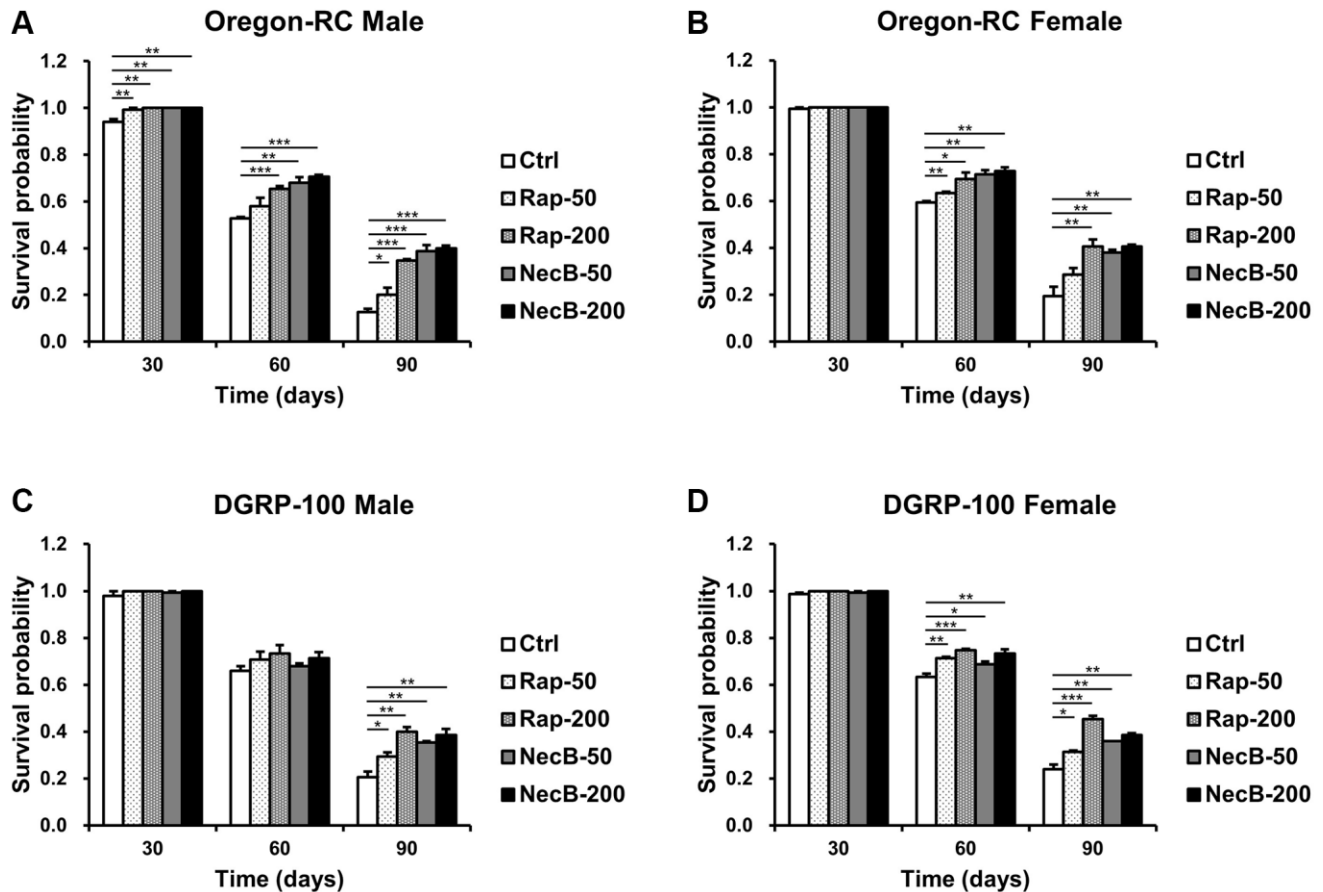

**Supplementary Figure 1. Nectandrin B increased the lifespan of *Drosophila melanogaster*.** (A) Oregon-RC males, (B) Oregon-RC females, (C) DGRP-100 males and (D) DGRP-100 females. Ctrl represents standard cornmeal medium; Rap-50 represents cornmeal medium supplemented with Rapamycin at 50  $\mu\text{g}/\text{mL}$ ; Rap-200 represents cornmeal medium supplemented with Rapamycin at 200  $\mu\text{g}/\text{mL}$ ; NecB-50 represents cornmeal medium supplemented with Nectandrin B at 50  $\mu\text{g}/\text{mL}$ ; and NecB-200 represents cornmeal medium supplemented with Nectandrin B at 200  $\mu\text{g}/\text{mL}$  (Supplementary Table 1). For the lifespan assay, the survival rate of 150 flies from each group was monitored with medium change every 2 days. The data are from three independent experiments, and values are shown as mean  $\pm$  s.e.m. Statistical significance was analyzed with an unpaired Student's *t*-test and indicated as \* $p < 0.05$ , \*\* $p < 0.01$ , and \*\*\* $p < 0.001$  from three independent experiments ( $n = 50$ ).
