# Supplementary material for: Nectandrin B significantly increases the lifespan of Drosophila - Nectandrin B for longevity
Source: publisher site journal article supplement (doi:10.18632/aging.205234), 2023-11-19
Supplement: Supplementary file [file aging-v15i22-205234-supplementary-material-SD2.pdf]

## SUPPLEMENTARY TABLE

**Supplementary Table 1. Media compositions used to maintain the *D. melanogaster* Oregon-RC and DGRP-100 strains.**

| <b>Ingredient</b>                   | <b>Ctrl</b> | <b>Rap-50</b> | <b>Rap-200</b> | <b>NecB-50</b> | <b>NecB-200</b> |
|-------------------------------------|-------------|---------------|----------------|----------------|-----------------|
| Corn meal (g/L)                     | 84          | 83.95         | 83.8           | 83.95          | 83.8            |
| Active dry yeast (g/L)              | 24          | 24            | 24             | 24             | 24              |
| Sucrose (g/L)                       | 47          | 47            | 47             | 47             | 47              |
| Agar (g/L)                          | 8           | 8             | 8              | 8              | 8               |
| Molasses (ml/L)                     | 25          | 25            | 25             | 25             | 25              |
| 10% Methyl 4-hydroxybenzoate (ml/L) | 10          | 10            | 10             | 10             | 10              |
| Propionic acid (ml/L)               | 4           | 4             | 4              | 4              | 4               |
| Rap-50 µg/mL                        | 0           | 0.05          | 0              | 0              | 0               |
| Rap-200 µg/mL                       | 0           | 0             | 0.2            | 0              | 0               |
| NecB-50 µg/mL                       | 0           | 0             | 0              | 0.05           | 0               |
| NecB-200 µg/mL                      | 0           | 0             | 0              | 0              | 0.2             |
